# Supplementary material for: Systemic complement activation is associated with respiratory failure in COVID-19 hospitalized patients
Source: PubMed Central journal article supplement (PMC7547220; doi:10.1073/pnas.2010540117), 2020-09-17
Supplement: pnas.2010540117.sd01.pdf [file pnas.2010540117.sd01.pdf]

# PNAS

[www.pnas.org](http://www.pnas.org)

Supporting Information Dataset for

**Systemic Complement Activation is Associated with Respiratory Failure in COVID-19 Hospitalized Patients – A Prospective Cohort Study**

Jan C. Holter<sup>a</sup>, Soeren E. Pischke<sup>a</sup>, Eline de Boer, Andreas Lind, Synne Jenum, Aleksander R. Holten, Kristian Tonby, Andreas Barratt-Due, Marina Sokolova, Camilla Schjalm, Viktoriia Chaban, Anette Kolderup, Trung Tran, Torleif Tollefsrud Gjølberg, Linda G. Skeie, Liv Hesstvedt, Vidar Ormåsen, Børre Fevang, Cathrine Austad, Karl Erik Müller, Cathrine Flateby, Mona Holberg-Petersen, Bente Halvorsen, Fredrik Müller, Pål Aukrust, Susanne Dudman, Thor Ueland, Jan Terje Andersen, Fridtjof Lund-Johansen, Lars Heggelund, Anne M. Dyrhol-Riise, Tom E. Mollnes.

<sup>a</sup> These authors contributed equally to the manuscript

Corresponding author: Soeren E. Pischke  
Email: [s.e.pischke@medisin.uio.no](mailto:s.e.pischke@medisin.uio.no)

**This PDF file includes:**

Dataset S1

## Supporting Information Dataset S1

| <b>Type of model / Covariates</b>                   |                      |                 |                    |           |                |
|-----------------------------------------------------|----------------------|-----------------|--------------------|-----------|----------------|
| <b>Linear regression</b>                            | <b>Admission day</b> | <b>R-square</b> | <b>95% CI</b>      | <b>df</b> | <b>p value</b> |
| <b>Daily PaO<sub>2</sub>/FiO<sub>2</sub> ratio</b>  |                      |                 |                    |           |                |
| sC5b-9 vs. PaO <sub>2</sub> /FiO <sub>2</sub> ratio | 3-5                  | 0.044           | [-8.414 - 3.122]   | 21        | 0.350          |
| sC5b-9 vs. PaO <sub>2</sub> /FiO <sub>2</sub> ratio | 7+                   | 0.002           | [-24.341 - 20.658] | 17        | 0.864          |
| C5a vs. PaO <sub>2</sub> /FiO <sub>2</sub> ratio    | 1                    | 0.057           | [-1.872 - 0.416]   | 29        | 0.203          |
| C5a vs. PaO <sub>2</sub> /FiO <sub>2</sub> ratio    | 3-5                  | 0.002           | [-1.682 - 2.050]   | 21        | 0.840          |
| C5a vs. PaO <sub>2</sub> /FiO <sub>2</sub> ratio    | 7+                   | 0.121           | [-0.683 - 3.892]   | 17        | 0.156          |
| C4d vs. PaO <sub>2</sub> /FiO <sub>2</sub> ratio    | 3-5                  | 0.065           | [-0.005 - 0.001]   | 21        | 0.252          |
| C4d vs. PaO <sub>2</sub> /FiO <sub>2</sub> ratio    | 7+                   | 0.067           | [-0.011 - 0.004]   | 17        | 0.300          |
| C3bc vs. PaO <sub>2</sub> /FiO <sub>2</sub> ratio   | 1                    | 0.036           | [-1.421 - 0.474]   | 29        | 0.315          |
| C3bc vs. PaO <sub>2</sub> /FiO <sub>2</sub> ratio   | 3-5                  | 0.045           | [-0.863 - 0.313]   | 21        | 0.341          |
| C3bc vs. PaO <sub>2</sub> /FiO <sub>2</sub> ratio   | 7+                   | 0.018           | [-2.675 - 1.577]   | 17        | 0.592          |
| C3bBbP vs. PaO <sub>2</sub> /FiO <sub>2</sub> ratio | 1                    | 0.000           | [-0.241 - 0.221]   | 29        | 0.930          |
| C3bBbP vs. PaO <sub>2</sub> /FiO <sub>2</sub> ratio | 3-5                  | 0.047           | [-0.560 - 0.199]   | 21        | 0.333          |
| C3bBbP vs. PaO <sub>2</sub> /FiO <sub>2</sub> ratio | 7+                   | 0.002           | [-0.617 - 0.522]   | 17        | 0.862          |
| MBL vs. PaO <sub>2</sub> /FiO <sub>2</sub> ratio    | 1                    | 0.000           | [-0.006 - 0.006]   | 29        | 0.934          |
| MBL vs. PaO <sub>2</sub> /FiO <sub>2</sub> ratio    | 3-5                  | 0.003           | [-0.005 - 0.006]   | 21        | 0.874          |
| MBL vs. PaO <sub>2</sub> /FiO <sub>2</sub> ratio    | 7+                   | 0.114           | [-0.017 - 0.003]   | 17        | 0.171          |
| <b>Daily FiO<sub>2</sub></b>                        |                      |                 |                    |           |                |
| sC5b-9 vs. daily FiO <sub>2</sub>                   | 1                    | 0.075           | [-0.022 - 0.148]   | 29        | 0.143          |
| sC5b-9 vs. daily FiO <sub>2</sub>                   | 3-5                  | 0.095           | [-0.015 - 0.087]   | 22        | 0.153          |
| sC5b-9 vs. daily FiO <sub>2</sub>                   | 7+                   | 0.070           | [-0.145 - 0.502]   | 19        | 0.261          |
| C5a vs. daily FiO <sub>2</sub>                      | 1                    | 0.003           | [-0.008 - 0.013]   | 29        | 0.620          |
| C5a vs. daily FiO <sub>2</sub>                      | 3-5                  | 0.008           | [-0.020 - 0.014]   | 22        | 0.682          |
| C5a vs. daily FiO <sub>2</sub>                      | 7+                   | 0.034           | [-0.049 - 0.022]   | 19        | 0.433          |
| C4d vs. daily FiO <sub>2</sub>                      | 1                    | 0.035           | [0.000 - 0.000]    | 29        | 0.319          |
| C4d vs. daily FiO <sub>2</sub>                      | 3-5                  | 0.145           | [0.000 - 0.000]    | 22        | 0.073          |
| C4d vs. daily FiO <sub>2</sub>                      | 7+                   | 0.054           | [0.000 - 0.000]    | 19        | 0.323          |
| C3bc vs. daily FiO <sub>2</sub>                     | 1                    | 0.036           | [-0.004 - 0.013]   | 30        | 0.317          |
| C3bc vs. daily FiO <sub>2</sub>                     | 3-5                  | 0.082           | [-0.002 - 0.009]   | 22        | 0.185          |
| C3bc vs. daily FiO <sub>2</sub>                     | 7+                   | 0.005           | [-0.027 - 0.036]   | 19        | 0.768          |
| C3bBbP vs. daily FiO <sub>2</sub>                   | 1                    | 0.025           | [-0.001 - 0.003]   | 29        | 0.404          |
| C3bBbP vs. daily FiO <sub>2</sub>                   | 3-5                  | 0.115           | [-0.001 - 0.006]   | 22        | 0.113          |
| C3bBbP vs. daily FiO <sub>2</sub>                   | 7+                   | 0.070           | [-0.004 - 0.013]   | 19        | 0.259          |
| MBL vs. daily FiO <sub>2</sub>                      | 1                    | 0.042           | [0.000 - 0.000]    | 29        | 0.275          |

|                                |     |       |                 |    |       |
|--------------------------------|-----|-------|-----------------|----|-------|
| MBL vs. daily FiO <sub>2</sub> | 3-5 | 0.054 | [0.000 - 0.000] | 22 | 0.284 |
| MBL vs. daily FiO <sub>2</sub> | 7+  | 0.053 | [0.000 - 0.000] | 19 | 0.330 |

---

### Daily PaO<sub>2</sub>

|                                   |     |       |                  |    |              |
|-----------------------------------|-----|-------|------------------|----|--------------|
| sC5b-9 vs. daily PaO <sub>2</sub> | 1   | 0.014 | [-1.765 - 0.941] | 29 | 0.538        |
| sC5b-9 vs. daily PaO <sub>2</sub> | 3-5 | 0.007 | [-0.998 - 1.423] | 21 | 0.718        |
| sC5b-9 vs. daily PaO <sub>2</sub> | 7+  | 0.009 | [-1.729 - 2.473] | 17 | 0.712        |
| C5a vs. daily PaO <sub>2</sub>    | 1   | 0.009 | [-0.203 - 0.123] | 29 | 0.617        |
| C5a vs. daily PaO <sub>2</sub>    | 3-5 | 0.000 | [-0.376 - 0.393] | 21 | 0.964        |
| C5a vs. daily PaO <sub>2</sub>    | 7+  | 0.130 | [-0.057 - 0.369] | 17 | 0.141        |
| C4d vs. daily PaO <sub>2</sub>    | 1   | 0.044 | [-0.001 - 0.000] | 29 | 0.267        |
| C4d vs. daily PaO <sub>2</sub>    | 3-5 | 0.036 | [0.000 - 0.001]  | 21 | 0.398        |
| C4d vs. daily PaO <sub>2</sub>    | 7+  | 0.000 | [-0.001 - 0.001] | 17 | 0.935        |
| C3bc vs. daily PaO <sub>2</sub>   | 1   | 0.003 | [-0.114 - 0.154] | 29 | 0.763        |
| C3bc vs. daily PaO <sub>2</sub>   | 3-5 | 0.027 | [-0.078 - 0.166] | 21 | 0.462        |
| C3bc vs. daily PaO <sub>2</sub>   | 7+  | 0.023 | [-0.142 - 0.256] | 17 | 0.552        |
| C3bBbP vs. daily PaO <sub>2</sub> | 1   | 0.043 | [-0.014 - 0.049] | 29 | 0.270        |
| C3bBbP vs. daily PaO <sub>2</sub> | 3-5 | 0.017 | [-0.053 - 0.095] | 21 | 0.586        |
| C3bBbP vs. daily PaO <sub>2</sub> | 7+  | 0.027 | [-0.036 - 0.069] | 17 | 0.511        |
| MBL vs. daily PaO <sub>2</sub>    | 1   | 0.055 | [0.000 - 0.001]  | 29 | 0.212        |
| MBL vs. daily PaO <sub>2</sub>    | 3-5 | 0.232 | [0.000 - 0.002]  | 21 | <b>0.023</b> |
| MBL vs. daily PaO <sub>2</sub>    | 7+  | 0.097 | [-0.002 - 0.000] | 17 | 0.208        |

---

### Quick Sequential Organ Failure Assessment (qSOFA) at admission

|                  |   |       |                  |    |       |
|------------------|---|-------|------------------|----|-------|
| sC5b-9 vs. qSOFA | 1 | 0.032 | [-0.227 - 0.615] | 28 | 0.354 |
| C5a vs. qSOFA    | 1 | 0.056 | [-0.019 - 0.081] | 28 | 0.217 |
| C4d vs. qSOFA    | 1 | 0.090 | [0.000 - 0.000]  | 28 | 0.113 |
| C3bc vs. qSOFA   | 1 | 0.019 | [-0.027 - 0.056] | 28 | 0.479 |
| C3bBbP vs. qSOFA | 1 | 0.015 | [-0.013 - 0.007] | 28 | 0.529 |
| MBL vs. qSOFA    | 1 | 0.053 | [0.000 - 0.000]  | 28 | 0.229 |

---

### Sequential Organ Failure Assessment (SOFA) at admission

|                 |   |       |                  |    |       |
|-----------------|---|-------|------------------|----|-------|
| sC5b-9 vs. SOFA | 1 | 0.008 | [-1.344 - 1.946] | 20 | 0.706 |
| C5a vs. SOFA    | 1 | 0.000 | [-0.207 - 0.190] | 20 | 0.930 |
| C4d vs. SOFA    | 1 | 0.015 | [-0.001 - 0.000] | 20 | 0.593 |
| C3bc vs. SOFA   | 1 | 0.003 | [-0.143 - 0.181] | 20 | 0.807 |
| C3bBbP vs. SOFA | 1 | 0.005 | [-0.044 - 0.033] | 20 | 0.764 |
| MBL vs. SOFA    | 1 | 0.008 | [-0.001 - 0.001] | 20 | 0.705 |

---

### Daily Sequential Organ Failure Assessment (SOFA)

|                       |     |       |                  |    |       |
|-----------------------|-----|-------|------------------|----|-------|
| sC5b-9 vs. daily SOFA | 1   | 0.010 | [-1.434 - 2.155] | 18 | 0.677 |
| sC5b-9 vs. daily SOFA | 3-5 | 0.255 | [-2.722 - 0.173] | 12 | 0.079 |
| sC5b-9 vs. daily SOFA | 7+  | 0.003 | [-2.856 - 2.471] | 11 | 0.875 |

|                       |     |       |                   |    |       |
|-----------------------|-----|-------|-------------------|----|-------|
| C5a vs. daily SOFA    | 1   | 0.002 | [-0.234 - 0.199]  | 18 | 0.868 |
| C5a vs. daily SOFA    | 3-5 | 0.106 | [-0.762 - 0.242]  | 12 | 0.278 |
| C5a vs. daily SOFA    | 7+  | 0.127 | [-0.416 - 0.124]  | 11 | 0.255 |
| C4d vs. daily SOFA    | 1   | 0.000 | [-0.001 - 0.001]  | 18 | 0.974 |
| C4d vs. daily SOFA    | 3-5 | 0.000 | [-0.001 - 0.001]  | 12 | 0.942 |
| C4d vs. daily SOFA    | 7+  | 0.008 | [-0.001 - 0.001]  | 11 | 0.783 |
| C3bc vs. daily SOFA   | 1   | 0.007 | [-0.148 - 0.206]  | 18 | 0.732 |
| C3bc vs. daily SOFA   | 3-5 | 0.302 | [-0.285 - -0.001] | 12 | 0.052 |
| C3bc vs. daily SOFA   | 7+  | 0.153 | [-0.375 - 0.093]  | 11 | 0.209 |
| C3bBbP vs. daily SOFA | 1   | 0.012 | [-0.049 - 0.035]  | 18 | 0.728 |
| C3bBbP vs. daily SOFA | 3-5 | 0.123 | [-0.162 - 0.045]  | 12 | 0.239 |
| C3bBbP vs. daily SOFA | 7+  | 0.173 | [-0.101 - 0.022]  | 11 | 0.179 |
| MBL vs. daily SOFA    | 1   | 0.005 | [-0.001 - 0.001]  | 18 | 0.783 |
| MBL vs. daily SOFA    | 3-5 | 0.027 | [-0.002 - 0.001]  | 12 | 0.593 |
| MBL vs. daily SOFA    | 7+  | 0.014 | [-0.001 - 0.001]  | 11 | 0.710 |

---

#### National Early Warning Score (NEWS) at admission

|                 |   |       |                  |    |       |
|-----------------|---|-------|------------------|----|-------|
| sC5b-9 vs. NEWS | 1 | 0.071 | [-0.717 - 4.058] | 28 | 0.163 |
| C5a vs. NEWS    | 1 | 0.067 | [-0.092 - 0.483] | 28 | 0.175 |
| C4d vs. NEWS    | 1 | 0.043 | [0.000 - 0.001]  | 28 | 0.278 |
| C3bc vs. NEWS   | 1 | 0.034 | [-0.125 - 0.354] | 28 | 0.336 |
| C3bBbP vs. NEWS | 1 | 0.013 | [-0.075 - 0.041] | 28 | 0.553 |
| MBL vs. NEWS    | 1 | 0.023 | [-0.001 - 0.002] | 28 | 0.427 |

---

#### Daily platelet count

|                                 |     |       |                    |    |       |
|---------------------------------|-----|-------|--------------------|----|-------|
| sC5b-9 vs. daily platelet count | 1   | 0.043 | [-70.099 - 23.202] | 25 | 0.310 |
| sC5b-9 vs. daily platelet count | 3-5 | 0.016 | [-55.183 - 31.668] | 21 | 0.578 |
| sC5b-9 vs. daily platelet count | 7+  | 0.068 | [-379.86 - 117.25] | 18 | 0.281 |
| C5a vs. daily platelet count    | 1   | 0.005 | [-6.638 - 4.799]   | 25 | 0.743 |
| C5a vs. daily platelet count    | 3-5 | 0.008 | [-11.106 - 16.503] | 21 | 0.688 |
| C5a vs. daily platelet count    | 7+  | 0.012 | [-21.722 - 33.746] | 18 | 0.653 |
| C4d vs. daily platelet count    | 1   | 0.023 | [-0.019 - 0.009]   | 25 | 0.464 |
| C4d vs. daily platelet count    | 3-5 | 0.017 | [-0.033 - 0.019]   | 21 | 0.561 |
| C4d vs. daily platelet count    | 7+  | 0.001 | [-0.091 - 0.080]   | 18 | 0.890 |
| C3bc vs. daily platelet count   | 1   | 0.036 | [-7.564 - 1.465]   | 25 | 0.176 |
| C3bc vs. daily platelet count   | 3-5 | 0.000 | [-4.631 - 4.300]   | 21 | 0.939 |
| C3bc vs. daily platelet count   | 7+  | 0.087 | [-9.279 - 37.597]  | 18 | 0.220 |
| C3bBbP vs. daily platelet count | 1   | 0.002 | [-1.004 - 1.243]   | 25 | 0.828 |
| C3bBbP vs. daily platelet count | 3-5 | 0.007 | [-2.342 - 3.405]   | 21 | 0.704 |
| C3bBbP vs. daily platelet count | 7+  | 0.007 | [-5.425 - 7.556]   | 18 | 0.733 |
| MBL vs. daily platelet count    | 1   | 0.036 | [-0.042 - 0.016]   | 25 | 0.355 |

|                              |     |       |                  |    |       |
|------------------------------|-----|-------|------------------|----|-------|
| MBL vs. daily platelet count | 3-5 | 0.004 | [-0.049 - 0.037] | 21 | 0.777 |
| MBL vs. daily platelet count | 7+  | 0.033 | [-0.078 - 0.166] | 18 | 0.456 |

---

### Daily d-dimer

|                                       |     |       |                   |    |       |
|---------------------------------------|-----|-------|-------------------|----|-------|
| sC5b-9 vs. daily d-dimer              | 1   | 0.001 | [-1.400 - 3.921]  | 23 | 0.591 |
| sC5b-9 vs. daily d-dimer              | 3-5 | 0.023 | [-7.414 - 4.637]  | 12 | 0.622 |
| sC5b-9 vs. daily d-dimer              | 7+  | 0.139 | [-31.950 - 9.711] | 10 | 0.258 |
| C5a vs. daily d-dimer                 | 1   | 0.011 | [-0.794 - 0.486]  | 23 | 0.622 |
| C5a vs. daily d-dimer                 | 3-5 | 0.058 | [-2.576 - 1.170]  | 12 | 0.426 |
| C5a vs. daily d-dimer                 | 7+  | 0.065 | [-3.175 - 1.531]  | 10 | 0.450 |
| C4d vs. daily d-dimer                 | 1   | 0.011 | [-0.002 - 0.001]  | 23 | 0.628 |
| C4d vs. daily d-dimer                 | 3-5 | 0.042 | [-0.005 - 0.002]  | 12 | 0.504 |
| C4d vs. daily d-dimer                 | 7+  | 0.017 | [-0.009 - 0.006]  | 10 | 0.699 |
| C3bc vs. daily d-dimer                | 1   | 0.040 | [-0.277 - 0.756]  | 23 | 0.346 |
| C3bc vs. daily d-dimer                | 3-5 | 0.138 | [-0.926 - 0.229]  | 12 | 0.211 |
| C3bc vs. daily d-dimer                | 7+  | 0.007 | [-2.366 - 1.898]  | 10 | 0.809 |
| C3bBbP vs. daily d-dimer              | 1   | 0.000 | [-0.122 - 0.131]  | 23 | 0.938 |
| C3bBbP vs. daily d-dimer <sup>a</sup> | 3-5 | 0.001 | [-0.058 - 0.052]  | 11 | 0.910 |
| C3bBbP vs. daily d-dimer              | 7+  | 0.011 | [-0.643 - 0.487]  | 10 | 0.762 |
| MBL vs. daily d-dimer                 | 1   | 0.055 | [-0.005 - 0.001]  | 23 | 0.269 |
| MBL vs. daily d-dimer                 | 3-5 | 0.079 | [-0.008 - 0.003]  | 12 | 0.351 |
| MBL vs. daily d-dimer                 | 7+  | 0.038 | [-0.013 - 0.008]  | 10 | 0.564 |

---

### Daily ferritin

|                                        |     |       |                    |    |              |
|----------------------------------------|-----|-------|--------------------|----|--------------|
| sC5b-9 vs. daily ferritin              | 1   | 0.279 | [259.84 - 1276.47] | 26 | <b>0.005</b> |
| sC5b-9 vs. daily ferritin              | 3-5 | 0.032 | [-160.33 - 327.51] | 17 | 0.478        |
| sC5b-9 vs. daily ferritin              | 7+  | 0.051 | [-547.23 - 1341.2] | 16 | 0.384        |
| C5a vs. daily ferritin                 | 1   | 0.006 | [-58.777 - 84.761] | 26 | 0.712        |
| C5a vs. daily ferritin                 | 3-5 | 0.021 | [-55.962 - 99.368] | 17 | 0.562        |
| C5a vs. daily ferritin                 | 7+  | 0.001 | [-110.973 - 98.98] | 16 | 0.905        |
| C4d vs. daily ferritin <sup>a</sup>    | 1   | 0.264 | [0.101 - 0.582]    | 25 | <b>0.007</b> |
| C4d vs. daily ferritin                 | 3-5 | 0.012 | [-0.117 - 0.179]   | 17 | 0.659        |
| C4d vs. daily ferritin                 | 7+  | 0.003 | [-0.289 - 0.838]   | 16 | 0.838        |
| C3bc vs. daily ferritin                | 1   | 0.239 | [18.615 - 121.408] | 26 | <b>0.010</b> |
| C3bc vs. daily ferritin                | 3-5 | 0.001 | [-26.907 - 23.660] | 17 | 0.893        |
| C3bc vs. daily ferritin                | 7+  | 0.073 | [-43.588 - 134.23] | 16 | 0.294        |
| C3bBbP vs. daily ferritin              | 1   | 0.004 | [-12.000 - 16.183] | 26 | 0.762        |
| C3bBbP vs. daily ferritin              | 3-5 | 0.000 | [-16.228 - 16.442] | 17 | 0.989        |
| C3bBbP vs. daily ferritin <sup>a</sup> | 7+  | 0.002 | [-20.477 - 17.656] | 15 | 0.876        |
| MBL vs. daily ferritin                 | 1   | 0.005 | [-0.428 - 0.305]   | 26 | 0.734        |
| MBL vs. daily ferritin                 | 3-5 | 0.078 | [-0.107 - 0.364]   | 17 | 0.264        |

|                                            |     |       |                    |    |              |
|--------------------------------------------|-----|-------|--------------------|----|--------------|
| MBL vs. daily ferritin                     | 7+  | 0.287 | [-0.060 - 0.846]   | 16 | <i>0.027</i> |
| <b>Daily c-reactive protein (CRP)</b>      |     |       |                    |    |              |
| sC5b-9 vs. daily CRP                       | 1   | 0.166 | [6.565 - 128.393]  | 27 | <b>0.031</b> |
| sC5b-9 vs. daily CRP <sup>a</sup>          | 3-5 | 0.008 | [-74.199 - 109.20] | 21 | 0.695        |
| sC5b-9 vs. daily CRP                       | 7+  | 0.020 | [-152.01 - 269.08] | 18 | 0.565        |
| C5a vs. daily CRP                          | 1   | 0.000 | [-8.353 - 7.682]   | 27 | 0.932        |
| C5a vs. daily CRP                          | 3-5 | 0.006 | [-17.347 - 12.345] | 22 | 0.730        |
| C5a vs. daily CRP                          | 7+  | 0.057 | [-33.112 - 11.654] | 18 | 0.326        |
| C4d vs. daily CRP <sup>a</sup>             | 1   | 0.033 | [-0.013 - 0.034]   | 26 | 0.363        |
| C4d vs. daily CRP <sup>a</sup>             | 3-5 | 0.019 | [-0.021 - 0.039]   | 21 | 0.545        |
| C4d vs. daily CRP                          | 7+  | 0.015 | [-0.087 - 0.053]   | 18 | 0.615        |
| C3bc vs. daily CRP <sup>a</sup>            | 1   | 0.064 | [-2.245 - 10.463]  | 26 | 0.195        |
| C3bc vs. daily CRP <sup>a</sup>            | 3-5 | 0.008 | [-4.685 - 6.846]   | 21 | 0.700        |
| C3bc vs. daily CRP                         | 7+  | 0.004 | [-22.866 - 17.568] | 18 | 0.786        |
| C3bBbP vs. daily CRP                       | 1   | 0.003 | [-1.370 - 1.772]   | 27 | 0.795        |
| C3bBbP vs. daily CRP <sup>a</sup>          | 3-5 | 0.063 | [-1.582 - 5.565]   | 21 | 0.259        |
| C3bBbP vs. daily CRP                       | 7+  | 0.106 | [-1.655 - 8.515]   | 18 | 0.173        |
| MBL vs. daily CRP                          | 1   | 0.002 | [-0.037 - 0.045]   | 27 | 0.828        |
| MBL vs. daily CRP                          | 3-5 | 0.035 | [-0.026 - 0.065]   | 22 | 0.390        |
| MBL vs. daily CRP                          | 7+  | 0.235 | [-0.007 - 0.186]   | 18 | <b>0.035</b> |
| <b>Daily white blood cell count (WBCs)</b> |     |       |                    |    |              |
| sC5b-9 vs. daily WBCs                      | 1   | 0.066 | [-0.789 - 3.840]   | 27 | 0.187        |
| sC5b-9 vs. daily WBCs <sup>a</sup>         | 3-5 | 0.022 | [-3.425 - 1.751]   | 21 | 0.508        |
| sC5b-9 vs. daily WBCs                      | 7+  | 0.004 | [-2.805 - 5.610]   | 18 | 0.491        |
| C5a vs. daily WBCs                         | 1   | 0.002 | [-0.316 - 0.259]   | 27 | 0.842        |
| C5a vs. daily WBCs                         | 3-5 | 0.027 | [-0.515 - 0.237]   | 22 | 0.450        |
| C5a vs. daily WBCs                         | 7+  | 0.096 | [-0.720 - 0.159]   | 18 | 0.196        |
| C4d vs. daily WBCs <sup>a</sup>            | 1   | 0.002 | [-0.001 - 0.001]   | 26 | 0.810        |
| C4d vs. daily WBCs                         | 3-5 | 0.106 | [0.000 - 0.001]    | 22 | 0.130        |
| C4d vs. daily WBCs                         | 7+  | 0.000 | [-0.001 - 0.001]   | 18 | 0.939        |
| C3bc vs. daily WBCs                        | 1   | 0.007 | [-0.186 - 0.283]   | 27 | 0.675        |
| C3bc vs. daily WBCs                        | 3-5 | 0.044 | [-0.063 - 0.177]   | 22 | 0.334        |
| C3bc vs. daily WBCs                        | 7+  | 0.025 | [-0.275 - 0.528]   | 18 | 0.516        |
| C3bBbP vs. daily WBCs                      | 1   | 0.009 | [-0.043 - 0.069]   | 27 | 0.632        |
| C3bBbP vs. daily WBCs                      | 3-5 | 0.031 | [-0.047 - 0.109]   | 22 | 0.424        |
| C3bBbP vs. daily WBCs <sup>a</sup>         | 7+  | 0.061 | [-0.054 - 0.154]   | 17 | 0.325        |
| MBL vs. daily WBCs                         | 1   | 0.002 | [-0.001 - 0.002]   | 27 | 0.809        |
| MBL vs. daily WBCs                         | 3-5 | 0.055 | [-0.002 - 0.001]   | 22 | 0.280        |
| MBL vs. daily WBCs                         | 7+  | 0.095 | [-0.001 - 0.003]   | 18 | 0.200        |

| <b>Viral load (quantified by qPCR) at admission</b> |   |       |                    |    |       |
|-----------------------------------------------------|---|-------|--------------------|----|-------|
| Viral load vs. sC5b-9                               | 1 | 0.025 | [-0.196 - 0.098]   | 20 | 0.490 |
| Viral load vs. C5a                                  | 1 | 0.038 | [-1.715 - 0.713]   | 20 | 0.399 |
| Viral load vs. C4d                                  | 1 | 0.020 | [-701.83 - 379.08] | 20 | 0.539 |
| Viral load vs. C3bc                                 | 1 | 0.018 | [-2.260 - 0.639]   | 20 | 0.256 |
| Viral load vs. C3bBbP                               | 1 | 0.020 | [-8.822 - 4.793]   | 20 | 0.543 |
| Viral load vs. MBL                                  | 1 | 0.001 | [-246.77 - 211.86] | 20 | 0.875 |

  

| <b>Logistic regression</b>                        | <b>Admission day</b> | <b>OR</b> | <b>95% CI</b>      | <b>n</b> | <b>p value</b> |
|---------------------------------------------------|----------------------|-----------|--------------------|----------|----------------|
| <b>Respiratory failure (RF) during whole stay</b> |                      |           |                    |          |                |
| sC5b-9 vs. RF                                     | 1                    | 11.889    | [0.913 – 154.756]  | 30       | 0.059          |
| sC5b-9 vs. RF                                     | 3-5                  | 1.471     | [0.374 - 5.790]    | 23       | 0.581          |
| sC5b-9 vs. RF                                     | 7+                   | 0.769     | [0.025 - 23.405]   | 20       | 0.880          |
| C5a (per 2 units) vs. RF                          | 1                    | 1.756     | [0.722 - 4.272]    | 30       | 0.214          |
| C5a (per 2 units) vs. RF                          | 3-5                  | 1.266     | [0.623 - 2.572]    | 23       | 0.515          |
| C5a (per 2 units) vs. RF                          | 7+                   | 1.057     | [0.484 - 2.309]    | 20       | 0.889          |
| C4d per 1000 units vs. RF                         | 1                    | 2.135     | [0.902 - 5.055]    | 30       | 0.085          |
| C4d (per 1000 units) vs. RF                       | 3-5                  | 1.574     | [0.659 - 3.761]    | 23       | 0.307          |
| C4d (per 1000 units) vs. RF                       | 7+                   | 1.071     | [0.327 - 3.513]    | 20       | 0.909          |
| C3bc (per 9 units) vs. RF                         | 1                    | 3.531     | [0.878 - 14.199]   | 30       | 0.076          |
| C3bc (per 9 units) vs. RF                         | 3-5                  | 2.496     | [0.594 - 10.498]   | 23       | 0.212          |
| C3bc (per 9 units) vs. RF                         | 7+                   | 26.558    | [0.387 - 1821.317] | 20       | 0.128          |
| C3bBP (per 24 units) vs. RF                       | 1                    | 1.060     | [0.486 – 2.311]    | 30       | 0.883          |
| C3bBP (per 24 units) vs. RF                       | 3-5                  | 2.166     | [0.335 - 14.000]   | 23       | 0.417          |
| C3bBP (per 24 units) vs. RF                       | 7+                   | 1.032     | [0.123 - 8.644]    | 20       | 0.977          |
| MBL (per 500 units) vs. RF                        | 1                    | 1.055     | [0.693 - 1.607]    | 30       | 0.801          |
| MBL (per 500 units) vs. RF                        | 3-5                  | 0.914     | [0.579 - 1.445]    | 23       | 0.702          |
| MBL (per 500 units) vs. RF                        | 7+                   | 1.310     | [0.512 - 3.350]    | 20       | 0.573          |
| <b>Daily respiratory failure (RF)</b>             |                      |           |                    |          |                |
| sC5b-9 vs. daily RF                               | 3-5                  | 1.422     | [0.503 - 4.025]    | 22       | 0.507          |
| sC5b-9 vs. daily RF                               | 7+                   | 0.431     | [0.030 - 6.273]    | 18       | 0.538          |
| C5a (per 2 units) vs. daily RF                    | 1                    | 1.506     | [0.777 - 2.918]    | 30       | 0.225          |
| C5a (per 2 units) vs. daily RF                    | 3-5                  | 0.900     | [0.514 - 1.574]    | 22       | 0.711          |
| C5a (per 2 units) vs. daily RF                    | 7+                   | 0.669     | [0.362 - 1.236]    | 18       | 0.200          |
| C4d (per 1000 units) vs. daily RF                 | 1                    | 1.825     | [0.857 - 3.888]    | 30       | 0.119          |
| C4d (per 1000 units) vs. daily RF                 | 3-5                  | 1.394     | [0.678 - 2.863]    | 22       | 0.366          |
| C4d (per 1000 units) vs. daily RF                 | 7+                   | 1.729     | [0.535 - 5.588]    | 18       | 0.360          |
| C3bc (per 9 units) vs. daily RF                   | 1                    | 2.322     | [0.642 - 8.400]    | 30       | 0.199          |
| C3bc (per 9 units) vs. daily RF                   | 3-5                  | 1.608     | [0.579 - 4.461]    | 22       | 0.362          |

|                                   |     |       |                  |    |       |
|-----------------------------------|-----|-------|------------------|----|-------|
| C3bc (per 9 units) vs. daily RF   | 7+  | 4.078 | [0.268 - 49.094] | 18 | 0.268 |
| C3bBP (per 24 units) vs. daily RF | 1   | 1.132 | [0.519 - 2.465]  | 30 | 0.756 |
| C3bBP (per 24 units) vs. daily RF | 3-5 | 1.976 | [0.404 - 9.657]  | 22 | 0.400 |
| C3bBP (per 24 units) vs. daily RF | 7+  | 1.133 | [0.218 - 5.880]  | 18 | 0.881 |
| MBL (per 500 units) vs. daily RF  | 1   | 1.008 | [0.663 - 1.531]  | 30 | 0.972 |
| MBL (per 500 units) vs. daily RF  | 3-5 | 0.808 | [0.614 - 1.464]  | 22 | 0.808 |
| MBL (per 500 units) vs. daily RF  | 7+  | 1.933 | [0.832 - 4.495]  | 18 | 0.126 |

---

**Respiratory failure (RF) moderate and/or severe (m/s) during whole stay**

|                                 |     |       |                  |    |       |
|---------------------------------|-----|-------|------------------|----|-------|
| sC5b-9 vs. RF m/s               | 1   | 1.298 | [0.280 - 6.016]  | 30 | 0.738 |
| sC5b-9 vs. RF m/s               | 3-5 | 1.287 | [0.513 - 3.227]  | 23 | 0.591 |
| sC5b-9 vs. RF m/s               | 7+  | 0.242 | [0.017 - 3.494]  | 20 | 0.297 |
| C5a (per 2 units) vs. RF m/s    | 1   | 0.834 | [0.450 - 1.544]  | 30 | 0.834 |
| C5a (per 2 units) vs. RF m/s    | 3-5 | 0.816 | [0.445 - 1.495]  | 23 | 0.510 |
| C5a (per 2 units) vs. RF m/s    | 7+  | 0.636 | [0.333 - 1.217]  | 20 | 0.172 |
| C4d (per 1000 units) vs. RF m/s | 1   | 1.438 | [0.854 - 2.420]  | 30 | 0.172 |
| C4d (per 1000 units) vs. RF m/s | 3-5 | 1.660 | [0.834 - 3.303]  | 23 | 0.149 |
| C4d (per 1000 units) vs. RF m/s | 7+  | 1.645 | [0.653 - 4.144]  | 20 | 0.291 |
| C3bc (per 9 units) vs. RF m/s   | 1   | 3.318 | [0.692 - 15.905] | 30 | 0.134 |
| C3bc (per 9 units) vs. RF m/s   | 3-5 | 1.826 | [0.687 - 4.856]  | 23 | 0.228 |
| C3bc (per 9 units) vs. RF m/s   | 7+  | 0.888 | [0.105 - 7.475]  | 20 | 0.913 |
| C3bBP (per 24 units) vs. RF m/s | 1   | 0.976 | [0.386 - 2.466]  | 30 | 0.959 |
| C3bBP (per 24 units) vs. RF m/s | 3-5 | 4.008 | [0.583 - 27.537] | 23 | 0.158 |
| C3bBP (per 24 units) vs. RF m/s | 7+  | 0.968 | [0.214 - 4.371]  | 20 | 0.966 |
| MBL (per 500 units) vs. RF m/s  | 1   | 1.283 | [0.797- 2.067]   | 30 | 0.305 |
| MBL (per 500 units) vs. RF m/s  | 3-5 | 1.101 | [0.714 - 1.697]  | 23 | 0.664 |
| MBL (per 500 units) vs. RF m/s  | 7+  | 1.156 | [0.632 - 2.116]  | 20 | 0.637 |

---

**Daily respiratory failure (RF) moderate and/or severe (m/s)**

|                                       |     |       |                  |    |       |
|---------------------------------------|-----|-------|------------------|----|-------|
| sC5b-9 vs. daily RF m/s               | 1   | 1.802 | [0.315 - 10.299] | 30 | 0.508 |
| sC5b-9 vs. daily RF m/s               | 3-5 | 1.512 | [0.566 - 4.040]  | 22 | 0.410 |
| sC5b-9 vs. daily RF m/s               | 7+  | 1.929 | [0.113 - 33.032] | 18 | 0.650 |
| C5a (per 2 units) vs. daily RF m/s    | 1   | 0.332 | [0.035 - 3.203]  | 30 | 0.341 |
| C5a (per 2 units) vs. daily RF m/s    | 3-5 | 0.844 | [0.450 - 1.580]  | 22 | 0.595 |
| C5a (per 2 units) vs. daily RF m/s    | 7+  | 0.608 | [0.246 - 1.503]  | 18 | 0.281 |
| C4d (per 1000 units) vs. daily RF m/s | 1   | 1.459 | [0.881 - 2.416]  | 30 | 0.142 |
| C4d (per 1000 units) vs. daily RF m/s | 3-5 | 1.820 | [0.785 - 4.219]  | 22 | 0.163 |
| C4d (per 1000 units) vs. daily RF m/s | 7+  | 2.029 | [0.667 - 6.173]  | 18 | 0.213 |
| C3bc (per 9 units) vs. daily RF m/s   | 1   | 1.769 | [0.295 - 10.607] | 30 | 0.533 |
| C3bc (per 9 units) vs. daily RF m/s   | 3-5 | 1.773 | [0.645 - 4.869]  | 22 | 0.267 |
| C3bc (per 9 units) vs. daily RF m/s   | 7+  | 0.364 | [0.027 - 4.982]  | 18 | 0.449 |



|                                        |     |       |                  |    |       |
|----------------------------------------|-----|-------|------------------|----|-------|
| C3bBbP (per 24 units) vs. daily RF m/s | 1   | 1.164 | [0.434 - 3.122]  | 30 | 0.763 |
| C3bBbP (per 24 units) vs. daily RF m/s | 3-5 | 3.429 | [0.548 - 21.456] | 22 | 0.188 |
| C3bBbP (per 24 units) vs. daily RF m/s | 7+  | 1.053 | [0.183 - 6.066]  | 18 | 0.954 |
| MBL (per 500 units) vs. daily RF m/s   | 1   | 1.214 | [0.683 - 2.157]  | 30 | 0.509 |
| MBL (per 500 units) vs. daily RF m/s   | 3-5 | 1.158 | [0.740 - 1.811]  | 22 | 0.520 |
| MBL (per 500 units) vs. daily RF m/s   | 7+  | 1.354 | [0.661 - 2.774]  | 18 | 0.408 |

---

### Oxygen therapy during whole stay

|                                         |     |        |                    |    |       |
|-----------------------------------------|-----|--------|--------------------|----|-------|
| sC5b-9 vs. oxygen therapy               | 1   | 2.228  | [0.245 - 20.286]   | 27 | 0.477 |
| sC5b-9 vs. oxygen therapy               | 3-5 | 5.672  | [0.192 - 167.554]  | 20 | 0.315 |
| C5a (per 2 units) vs. oxygen therapy    | 1   | 5.199  | [0.543 - 49.796]   | 27 | 0.153 |
| C5a (per 2 units) vs. oxygen therapy    | 3-5 | 1.409  | [0.521 - 3.804]    | 20 | 0.499 |
| C4d (per 1000 units) vs. oxygen therapy | 3-5 | 44.917 | [0.563 - 3582.843] | 20 | 0.089 |
| C3bc (per 9 units) vs. oxygen therapy   | 1   | 3.437  | [0.645 - 18.320]   | 27 | 0.148 |
| C3bc (per 9 units) vs. oxygen therapy   | 3-5 | 3.656  | [0.430 - 31.094]   | 20 | 0.235 |
| C3bBP (per 24 units) vs. oxygen therapy | 1   | 0.716  | [0.318 - 1.615]    | 27 | 0.421 |
| C3bBP (per 24 units) vs. oxygen therapy | 3-5 | 0.954  | [0.054 - 17.012]   | 20 | 0.975 |
| MBL (per 500 units) vs. oxygen therapy  | 1   | 1.208  | [0.687 - 2.127]    | 27 | 0.511 |
| MBL (per 500 units) vs. oxygen therapy  | 3-5 | 0.923  | [0.568 - 1.868]    | 20 | 0.923 |

---

### Intensive Care Unit (ICU) during whole stay

|                                   |     |       |                  |    |       |
|-----------------------------------|-----|-------|------------------|----|-------|
| sC5b-9 vs. ICU stay               | 1   | 2.512 | [0.507 - 12.441] | 30 | 0.259 |
| sC5b-9 vs. ICU stay               | 3-5 | 1.572 | [0.594 - 4.158]  | 23 | 0.362 |
| sC5b-9 vs. ICU stay               | 7+  | 0.944 | [0.069 - 12.819] | 20 | 0.965 |
| C5a (per 2 units) vs. ICU stay    | 1   | 0.552 | [0.123 - 2.471]  | 30 | 0.437 |
| C5a (per 2 units) vs. ICU stay    | 3-5 | 0.805 | [0.401 - 1.616]  | 23 | 0.541 |
| C5a (per 2 units) vs. ICU stay    | 7+  | 0.707 | [0.356 - 1.402]  | 20 | 0.321 |
| C4d (per 1000 units) vs. ICU stay | 1   | 1.479 | [0.876 - 2.497]  | 30 | 0.143 |
| C4d (per 1000 units) vs. ICU stay | 3-5 | 1.543 | [0.848 - 2.807]  | 23 | 0.155 |
| C4d (per 1000 units) vs. ICU stay | 7+  | 2.408 | [0.849 - 6.825]  | 20 | 0.098 |
| C3bc (per 9 units) vs. ICU stay   | 1   | 3.075 | [0.539 - 17.552] | 30 | 0.206 |
| C3bc (per 9 units) vs. ICU stay   | 3-5 | 2.425 | [0.801 - 7.337]  | 23 | 0.117 |
| C3bc (per 9 units) vs. ICU stay   | 7+  | 1.033 | [0.118 - 9.089]  | 20 | 0.976 |
| C3bBP (per 24 units) vs. ICU stay | 1   | 1.094 | [0.420 - 2.848]  | 30 | 0.854 |
| C3bBP (per 24 units) vs. ICU stay | 3-5 | 2.868 | [0.548 - 15.005] | 23 | 0.212 |
| C3bBP (per 24 units) vs. ICU stay | 7+  | 3.863 | [0.594 - 25.139] | 20 | 0.157 |
| MBL (per 500 units) vs. ICU stay  | 1   | 1.021 | [0.586 - 1.778]  | 30 | 0.941 |
| MBL (per 500 units) vs. ICU stay  | 3-5 | 0.903 | [0.554 - 1.469]  | 23 | 0.680 |

|                                                    |     |       |                  |    |       |
|----------------------------------------------------|-----|-------|------------------|----|-------|
| MBL (per 500 units) vs. ICU stay                   | 7+  | 0.926 | [0.492 - 1.745]  | 20 | 0.813 |
| <b>Invasive ventilation (IV) during whole stay</b> |     |       |                  |    |       |
| sC5b-9 vs. IV                                      | 1   | 2.959 | [0.547 - 16.016] | 30 | 0.208 |
| sC5b-9 vs. IV                                      | 3-5 | 1.639 | [0.619 - 4.344]  | 23 | 0.320 |
| sC5b-9 vs. IV                                      | 7+  | 0.945 | [0.053 - 16.782] | 20 | 0.969 |
| C5a (per 2 units) vs. IV                           | 1   | 0.345 | [0.037 - 3.205]  | 30 | 0.349 |
| C5a (per 2 units) vs. IV                           | 3-5 | 0.790 | [0.371 - 1.684]  | 23 | 0.542 |
| C5a (per 2 units) vs. IV                           | 7+  | 0.794 | [0.387 - 1.627]  | 20 | 0.528 |
| C4d (per 1000 units) vs. IV                        | 1   | 1.679 | [0.893 - 3.159]  | 30 | 0.108 |
| C4d (per 1000 units) vs. IV                        | 3-5 | 1.157 | [0.663 - 2.020]  | 23 | 0.608 |
| C4d (per 1000 units) vs. IV                        | 7+  | 0.813 | [0.290 - 2.274]  | 20 | 0.693 |
| C3bc (per 9 units) vs. IV                          | 1   | 4.115 | [0.561 - 30.194] | 30 | 0.164 |
| C3bc (per 9 units) vs. IV                          | 3-5 | 1.682 | [0.685 - 4.130]  | 23 | 0.257 |
| C3bc (per 9 units) vs. IV                          | 7+  | 4.286 | [0.279 - 65.908] | 20 | 0.297 |
| C3bBP (per 24 units) vs. IV                        | 1   | 1.208 | [0.462 - 3.155]  | 30 | 0.700 |
| C3bBP (per 24 units) vs. IV                        | 3-5 | 2.191 | [0.470 - 10.221] | 23 | 0.318 |
| C3bBP (per 24 units) vs. IV                        | 7+  | 6.010 | [0.693 - 52.157] | 20 | 0.104 |
| MBL (per 500 units) vs. IV                         | 1   | 1.084 | [0.600 - 1.959]  | 30 | 0.790 |
| MBL (per 500 units) vs. IV                         | 3-5 | 0.967 | [0.589 - 1.588]  | 23 | 0.894 |
| MBL (per 500 units) vs. IV                         | 7+  | 1.111 | [0.564 - 2.188]  | 20 | 0.762 |
| <b>Use of inotropics during whole stay</b>         |     |       |                  |    |       |
| sC5b-9 vs. Inotropics                              | 1   | 0.921 | [0.073 - 2.516]  | 28 | 0.949 |
| sC5b-9 vs. Inotropics                              | 3-5 | 0.229 | [0.011 - 4.651]  | 21 | 0.337 |
| sC5b-9 vs. Inotropics                              | 7+  | 0.688 | [0.023 - 11.925] | 19 | 0.688 |
| C5a (per 2 units) vs. Inotropics                   | 1   | 0.629 | [0.119 - 3.323]  | 28 | 0.585 |
| C5a (per 2 units) vs. Inotropics                   | 3-5 | 0.821 | [0.376 - 1.794]  | 21 | 0.621 |
| C5a (per 2 units) vs. Inotropics                   | 7+  | 0.655 | [0.276 - 1.552]  | 19 | 0.336 |
| C4d (per 1000 units) vs. Inotropics                | 1   | 0.477 | [0.081 - 2.794]  | 28 | 0.412 |
| C4d (per 1000 units) vs. Inotropics                | 3-5 | 1.470 | [0.684 - 3.159]  | 21 | 0.324 |
| C4d (per 1000 units) vs. Inotropics                | 7+  | 1.615 | [0.647 - 4.028]  | 19 | 0.304 |
| C3bc (per 9 units) vs. Inotropics                  | 1   | 1.980 | [0.226 - 17.357] | 28 | 0.537 |
| C3bc (per 9 units) vs. Inotropics                  | 3-5 | 3.026 | [0.667 - 13.715] | 21 | 0.151 |
| C3bc (per 9 units) vs. Inotropics                  | 7+  | 0.913 | [0.075 - 11.537] | 19 | 0.956 |
| C3bBP (per 24 units) vs. Inotropics                | 1   | 1.123 | [0.368 - 3.427]  | 28 | 0.839 |
| C3bBP (per 24 units) vs. Inotropics                | 3-5 | 5.967 | [0.359 - 99.310] | 21 | 0.213 |
| C3bBP (per 24 units) vs. Inotropics                | 7+  | 2.234 | [0.394 - 12.658] | 19 | 0.364 |
| MBL (per 500 units) vs. Inotropics                 | 1   | 1.023 | [0.518 - 2.020]  | 28 | 0.947 |
| MBL (per 500 units) vs. Inotropics                 | 3-5 | 0.983 | [0.585 - 1.654]  | 21 | 0.949 |
| MBL (per 500 units) vs. Inotropics                 | 7+  | 1.266 | [0.631 - 2.540]  | 19 | 0.507 |

**Viral load (quantified by qPCR) at admission**

|                                     |   |       |                 |    |       |
|-------------------------------------|---|-------|-----------------|----|-------|
| Viral load vs. daily RF             | 1 | 1.213 | [0.585 - 1.654] | 25 | 0.393 |
| Viral load vs. RF during whole stay | 1 | 1.088 | [0.698 - 1.696] | 25 | 0.708 |

**Respiratory failure (RF) during whole stay: adjusted for antibody levels**

|                                     |   |        |                   |    |              |
|-------------------------------------|---|--------|-------------------|----|--------------|
| sC5b-9 vs. RF – IgG RBD             | 1 | 11.162 | [0.821 – 151.685] | 30 | 0.070        |
| sC5b-9 vs. RF – IgM RBD             | 1 | 10.976 | [0.839 – 143.645] | 30 | 0.068        |
| sC5b-9 vs. RF – IgG NC              | 1 | 12.062 | [0.889 – 163.732] | 30 | 0.061        |
| sC5b-9 vs. RF – IgM NC              | 1 | 14.410 | [1.124 – 184.780] | 30 | <b>0.040</b> |
| C5a (per 2 units) vs. RF – IgG RBD  | 1 | 2.074  | [0.751 - 5.727]   | 30 | 0.159        |
| C5a (per 2 units) vs. RF – IgM RBD  | 1 | 1.885  | [0.751 - 4.729]   | 30 | 0.177        |
| C5a (per 2 units) vs. RF – IgG NC   | 1 | 1.829  | [0.721 - 4.640]   | 30 | 0.204        |
| C5a (per 2 units) vs. RF – IgM NC   | 1 | 3.219  | [0.903 – 11.474]  | 30 | 0.071        |
| C4d per 1000 units vs. RF – IgG RBD | 1 | 2.079  | [0.868 - 4.983]   | 30 | 0.101        |
| C4d per 1000 units vs. RF – IgM RBD | 1 | 2.202  | [0.917 - 5.293]   | 30 | 0.078        |
| C4d per 1000 units vs. RF – IgG NC  | 1 | 2.105  | [0.887 - 4.999]   | 30 | 0.092        |
| C4d per 1000 units vs. RF – IgM NC  | 1 | 2.185  | [0.913 – 5.229]   | 30 | 0.079        |
| C3bc (per 9 units) vs. RF – IgG RBD | 1 | 3.760  | [0.864 - 16.364]  | 30 | 0.077        |
| C3bc (per 9 units) vs. RF – IgM RBD | 1 | 4.475  | [0.964 - 20.774]  | 30 | 0.056        |
| C3bc (per 9 units) vs. RF – IgG NC  | 1 | 4.189  | [0.940 - 18.677]  | 30 | 0.060        |
| C3bc (per 9 units) vs. RF – IgM NC  | 1 | 3.390  | [0.827 – 13.902]  | 30 | 0.090        |
| C3bBP (per 24 units) vs. R–IgG RBD  | 1 | 1.072  | [0.488 – 2.355]   | 30 | 0.863        |
| C3bBP (per 24 units) vs. RF–IgM RBD | 1 | 1.068  | [0.49 – 2.332]    | 30 | 0.870        |
| C3bBP (per 24 units) vs. RF–IgG NC  | 1 | 1.072  | [0.489 – 2.347]   | 30 | 0.862        |
| C3bBP (per 24 units) vs. RF–IgM NC  | 1 | 1.068  | [0.487 – 2.344]   | 30 | 0.869        |
| MBL (per 500 units) vs. RF–IgG RBD  | 1 | 1.074  | [0.702 - 1.645]   | 30 | 0.742        |
| MBL (per 500 units) vs. RF–IgM RBD  | 1 | 1.043  | [0.674 - 1.614]   | 30 | 0.851        |
| MBL (per 500 units) vs. RF–IgG NC   | 1 | 1.076  | [0.703 - 1.648]   | 30 | 0.735        |
| MBL (per 500 units) vs. RF–IgM NC   | 1 | 1.003  | [0.645 - 1.558]   | 30 | 0.990        |

**Daily respiratory failure (RF): adjusted for antibody levels**

|                                        |   |        |                   |    |       |
|----------------------------------------|---|--------|-------------------|----|-------|
| sC5b-9 vs. daily RF – IgG RBD          | 1 | 31.556 | [0.207 - 824.864] | 30 | 0.038 |
| sC5b-9 vs. daily RF – IgM RBD          | 1 | 31.951 | [1.246 - 819.342] | 30 | 0.036 |
| sC5b-9 vs. daily RF – IgG NC           | 1 | 37.744 | [1.317 - 1081.91] | 30 | 0.034 |
| sC5b-9 vs. daily RF – IgM NC           | 1 | 33.812 | [1.658 - 689.476] | 30 | 0.022 |
| C5a (per 2 units) vs. daily RF–IgG RBD | 1 | 1.776  | [0.777 - 4.058]   | 30 | 0.173 |
| C5a (per 2 units) vs. daily RF–IgM RBD | 1 | 1.624  | [0.790 - 3.337]   | 30 | 0.187 |
| C5a (per 2 units) vs. daily RF–IgG NC  | 1 | 1.570  | [0.764 - 3.228]   | 30 | 0.220 |
| C5a (per 2 units) vs. daily RF–IgM NC  | 1 | 2.078  | [0.845 – 5.111]   | 30 | 0.111 |

|                                           |   |       |                  |    |       |
|-------------------------------------------|---|-------|------------------|----|-------|
| C4d (per 1000 units) vs. daily RF-IgG RBD | 1 | 1.738 | [0.790 - 3.824]  | 30 | 0.170 |
| C4d (per 1000 units) vs. daily RF-IgM RBD | 1 | 1.909 | [0.860 - 4.240]  | 30 | 0.112 |
| C4d (per 1000 units) vs. daily RF-IgG NC  | 1 | 1.781 | [0.832 - 3.814]  | 30 | 0.138 |
| C4d (per 1000 units) vs. daily RF-IgM NC  | 1 | 1.836 | [0.859 - 3.923]  | 30 | 0.117 |
| C3bc (per 9 units) vs. daily RF-IgG RBD   | 1 | 2.442 | [0.607 - 9.818]  | 30 | 0.209 |
| C3bc (per 9 units) vs. daily RF-IgM RBD   | 1 | 2.901 | [0.693 - 12.137] | 30 | 0.145 |
| C3bc (per 9 units) vs. daily RF-IgG NC    | 1 | 2.773 | [0.703 - 10.947] | 30 | 0.145 |
| C3bc (per 9 units) vs. daily RF-IgM NC    | 1 | 2.269 | [0.618 - 8.331]  | 30 | 0.217 |
| C3bBP (per 24 units) vs. daily RF-IgG RBD | 1 | 1.155 | [0.523 - 2.550]  | 30 | 0.722 |
| C3bBP (per 24 units) vs. daily RF-IgM RBD | 1 | 1.145 | [0.524 - 2.504]  | 30 | 0.734 |
| C3bBP (per 24 units) vs. daily RF-IgG NC  | 1 | 1.154 | [0.526 - 2.531]  | 30 | 0.721 |
| C3bBP (per 24 units) vs. daily RF-IgM NC  | 1 | 1.136 | [0.520 - 2.484]  | 30 | 0.749 |
| MBL (per 500 units) vs. daily RF-IgG RBD  | 1 | 1.033 | [0.669 - 1.596]  | 30 | 0.882 |
| MBL (per 500 units) vs. daily RF-IgM RBD  | 1 | 0.990 | [0.634 - 1.546]  | 30 | 0.966 |
| MBL (per 500 units) vs. daily RF-IgG NC   | 1 | 1.039 | [0.677 - 1.595]  | 30 | 0.861 |
| MBL (per 500 units) vs. daily RF-IgM NC   | 1 | 0.978 | [0.631 - 1.514]  | 30 | 0.919 |

| <b>Ordinal regression</b> | <b>Admission day</b> | <b>R-square</b> | <b>95% CI</b> | <b>n</b> | <b>p value</b> |
|---------------------------|----------------------|-----------------|---------------|----------|----------------|
|---------------------------|----------------------|-----------------|---------------|----------|----------------|

|                                                               |  |  |  |  |  |
|---------------------------------------------------------------|--|--|--|--|--|
| <b>Respiratory failure (RF) worst stage during whole stay</b> |  |  |  |  |  |
|---------------------------------------------------------------|--|--|--|--|--|

|                        |     |       |                                 |    |       |
|------------------------|-----|-------|---------------------------------|----|-------|
| sC5b-9 vs. RF severity | 1   | 0.086 | [-0.374 - 2.223]                | 30 | 0.163 |
| sC5b-9 vs. RF severity | 3-5 | 0.011 | [-0.618 - 0.979]                | 23 | 0.657 |
| sC5b-9 vs. RF severity | 7+  | 0.001 | [-2.418 - 2.101]                | 20 | 0.891 |
| C5a vs. RF severity    | 1   | 0.018 | [-0.104 - 0.196]                | 30 | 0.547 |
| C5a vs. RF severity    | 3-5 | 0.001 | [-0.264 - 0.235]                | 23 | 0.908 |
| C5a vs. RF severity    | 7+  | 0.058 | [-0.380 - 0.124]                | 20 | 0.321 |
| C4d vs. RF severity    | 1   | 0.130 | [-0.4x10 <sup>-7</sup> - 0.001] | 30 | 0.080 |
| C4d vs. RF severity    | 3-5 | 0.148 | [-0.5x10 <sup>-7</sup> - 0.001] | 23 | 0.072 |
| C4d vs. RF severity    | 7+  | 0.082 | [0.000 - 0.001]                 | 20 | 0.213 |
| C3bc vs. RF severity   | 3-5 | 0.093 | [-0.026 - 0.146]                | 23 | 0.169 |

|                        |     |       |                  |    |       |
|------------------------|-----|-------|------------------|----|-------|
| C3bc vs. RF severity   | 7+  | 0.007 | [-0.174 - 0.258] | 20 | 0.701 |
| C3bBbP vs. RF severity | 1   | 0.000 | [-0.029 - 0.031] | 30 | 0.953 |
| C3bBbP vs. RF severity | 3-5 | 0.078 | [-0.021 - 0.089] | 23 | 0.222 |
| C3bBbP vs. RF severity | 7+  | 0.003 | [-0.049 - 0.065] | 20 | 0.791 |
| MBL vs. RF severity    | 1   | 0.013 | [-0.001 - 0.001] | 30 | 0.545 |
| MBL vs. RF severity    | 3-5 | 0.000 | [-0.001 - 0.001] | 23 | 0.983 |
| MBL vs. RF severity    | 7+  | 0.056 | [-0.000 - 0.002] | 20 | 0.266 |

---

**Daily respiratory failure (RF) non, mild, moderate or severe**

|                           |     |       |                  |    |       |
|---------------------------|-----|-------|------------------|----|-------|
| sC5b-9 vs. daily RF stage | 3-5 | 0.027 | [-0.536 - 1.117] | 22 | 0.419 |
| sC5b-9 vs. daily RF stage | 7+  | 0.001 | [2.171 -2.568]   | 18 | 0.869 |
| C5a vs. daily RF stage    | 1   | 0.029 | [-0.094 - 0.213] | 30 | 0.446 |
| C5a vs. daily RF stage    | 3-5 | 0.013 | [-0.340 - 0.204] | 22 | 0.622 |
| C5a vs. daily RF stage    | 7+  | 0.120 | [-0.484 - 0.090] | 18 | 0.178 |
| C4d vs. daily RF stage    | 3-5 | 0.064 | [0.000 - 0.001]  | 22 | 0.282 |
| C4d vs. daily RF stage    | 7+  | 0.140 | [0.001 - 0.002]  | 18 | 0.118 |
| C3bc vs. daily RF stage   | 1   | 0.070 | [-0.040 - 0.231] | 30 | 0.165 |
| C3bc vs. daily RF stage   | 3-5 | 0.374 | [-0.049 - 0.131] | 22 | 0.374 |
| C3bc vs. daily RF stage   | 7+  | 0.009 | [-0.183 - 0.276] | 18 | 0.693 |
| C3bBbP vs. daily RF stage | 1   | 0.005 | [-0.025 - 0.036] | 30 | 0.717 |
| C3bBbP vs. daily RF stage | 3-5 | 0.055 | [-0.028 - 0.085] | 22 | 0.325 |
| C3bBbP vs. daily RF stage | 7+  | 0.006 | [-0.049 - 0.072] | 18 | 0.707 |
| MBL vs. daily RF stage    | 1   | 0.002 | [-0.001 - 0.001] | 30 | 0.812 |
| MBL vs. daily RF stage    | 3-5 | 0.001 | [-0.001 - 0.001] | 22 | 0.886 |
| MBL vs. daily RF stage    | 7+  | 0.151 | [0.000 - 0.002]  | 18 | 0.109 |

---
